# Supplementary material
Source: PubMed Central journal article supplement (PMC5718913)
Supplement: NIHMS917633-supplement-Supplementary_Figures_and_Tables.pdf [file NIHMS917633-supplement-Supplementary_Figures_and_Tables.pdf]

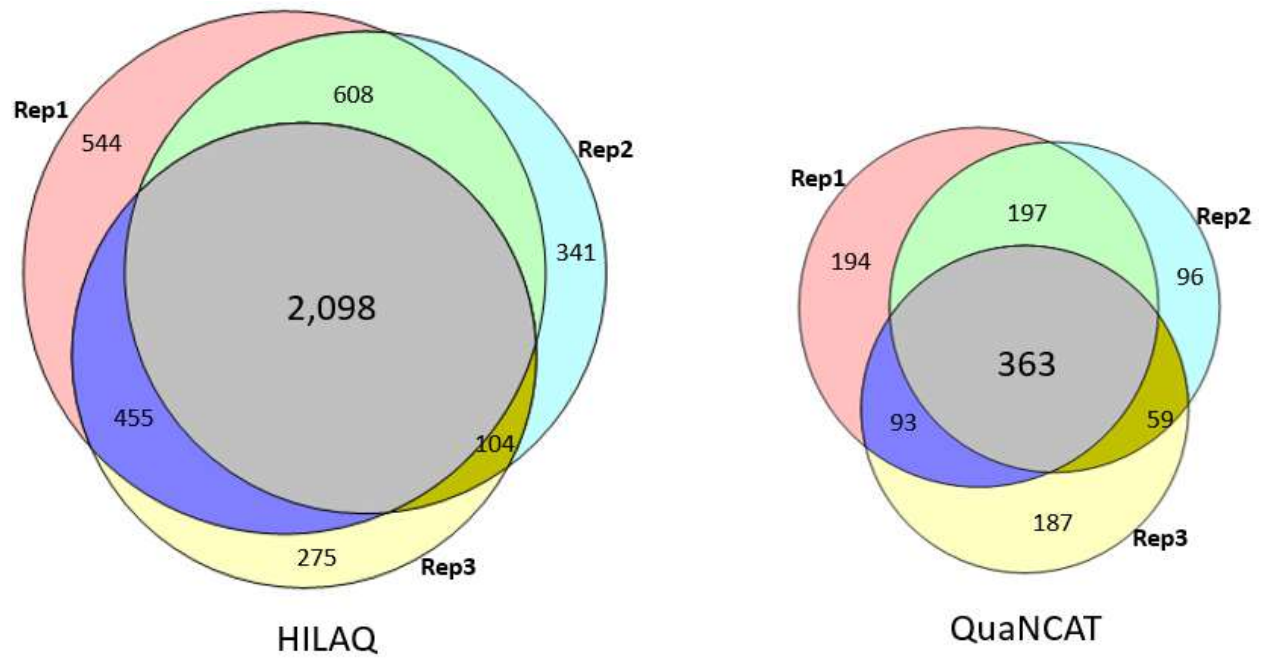

### Supplementary Figure 1

#### Overlap of identification on three replicates of HILAQ or QuaNCAT

There were 2,098 NSP were confidentially identified by HILAQ and 363 NSP by QuaNCAT from three biological replicates.

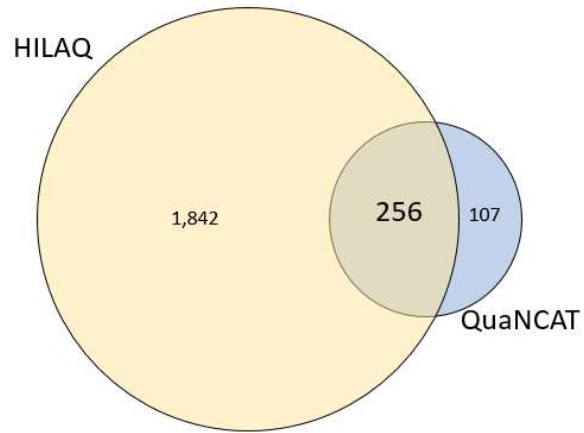

### Supplementary Figure 2

#### Venn diagram analysis comparison between HILAQ and QuaNCAT on identification

Number counts came from the overlap of three independent samples of HILAQ or QuaNCAT. There were 256 NSP were confidently identified by both strategies. However, 1,842 NSP were only identified by HILAQ.

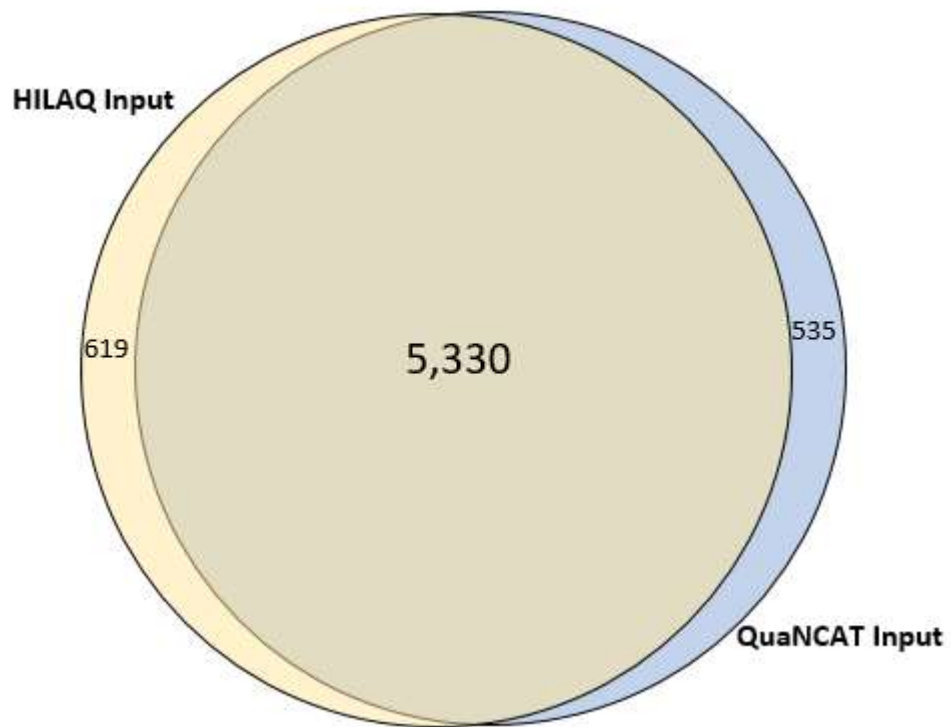

**Supplementary Figure 3**

Over 90% of proteins identified from the baseline of both strategies were in common.

**Supplementary Table 1**

Identification results for HILAQ and QuaNCAT. Enrichment efficiency (EE) calculated from this formula:

$$EE=100*\text{Modified protein number}/(\text{modified protein number} + \text{unmodified protein number})$$

| Rep      | HILAQ    |         |            |         |       | QuaNCAT  |         |            |         |       |
|----------|----------|---------|------------|---------|-------|----------|---------|------------|---------|-------|
|          | Modified |         | Unmodified |         | EE    | Modified |         | unmodified |         | EE    |
|          | Protein  | Peptide | Protein    | peptide |       | Protein  | Peptide | Protein    | peptide |       |
| <b>1</b> | 3,705    | 31,248  | 1,053      | 6,114   | 77.8% | 847      | 2,979   | 4,826      | 40,433  | 14.9% |
| <b>2</b> | 3,151    | 31,738  | 842        | 4,402   | 78.9% | 715      | 2,237   | 4,866      | 37,732  | 12.8% |
| <b>3</b> | 2,932    | 26,849  | 673        | 4,257   | 81.3% | 702      | 2,199   | 4,325      | 29,620  | 14.0% |

**Supplementary Table 2:** Quantification efficiency comparison between HILAQ and QuaNCAT. Only protein identified or quantified with sigma less than or equal 0.5 in all three independent biological replicates were counted for all other statistics.

| <b>Overlap of 3 replicates</b>   | <b>HILAQ</b> | <b>QuaNCAT</b> |
|----------------------------------|--------------|----------------|
| <b>Identification</b>            | 2,098        | 363            |
| <b>Quantification</b>            | 1,926        | 353            |
| <b>Quantification efficiency</b> | 91.80%       | 97.20%         |

## Pathways analysis

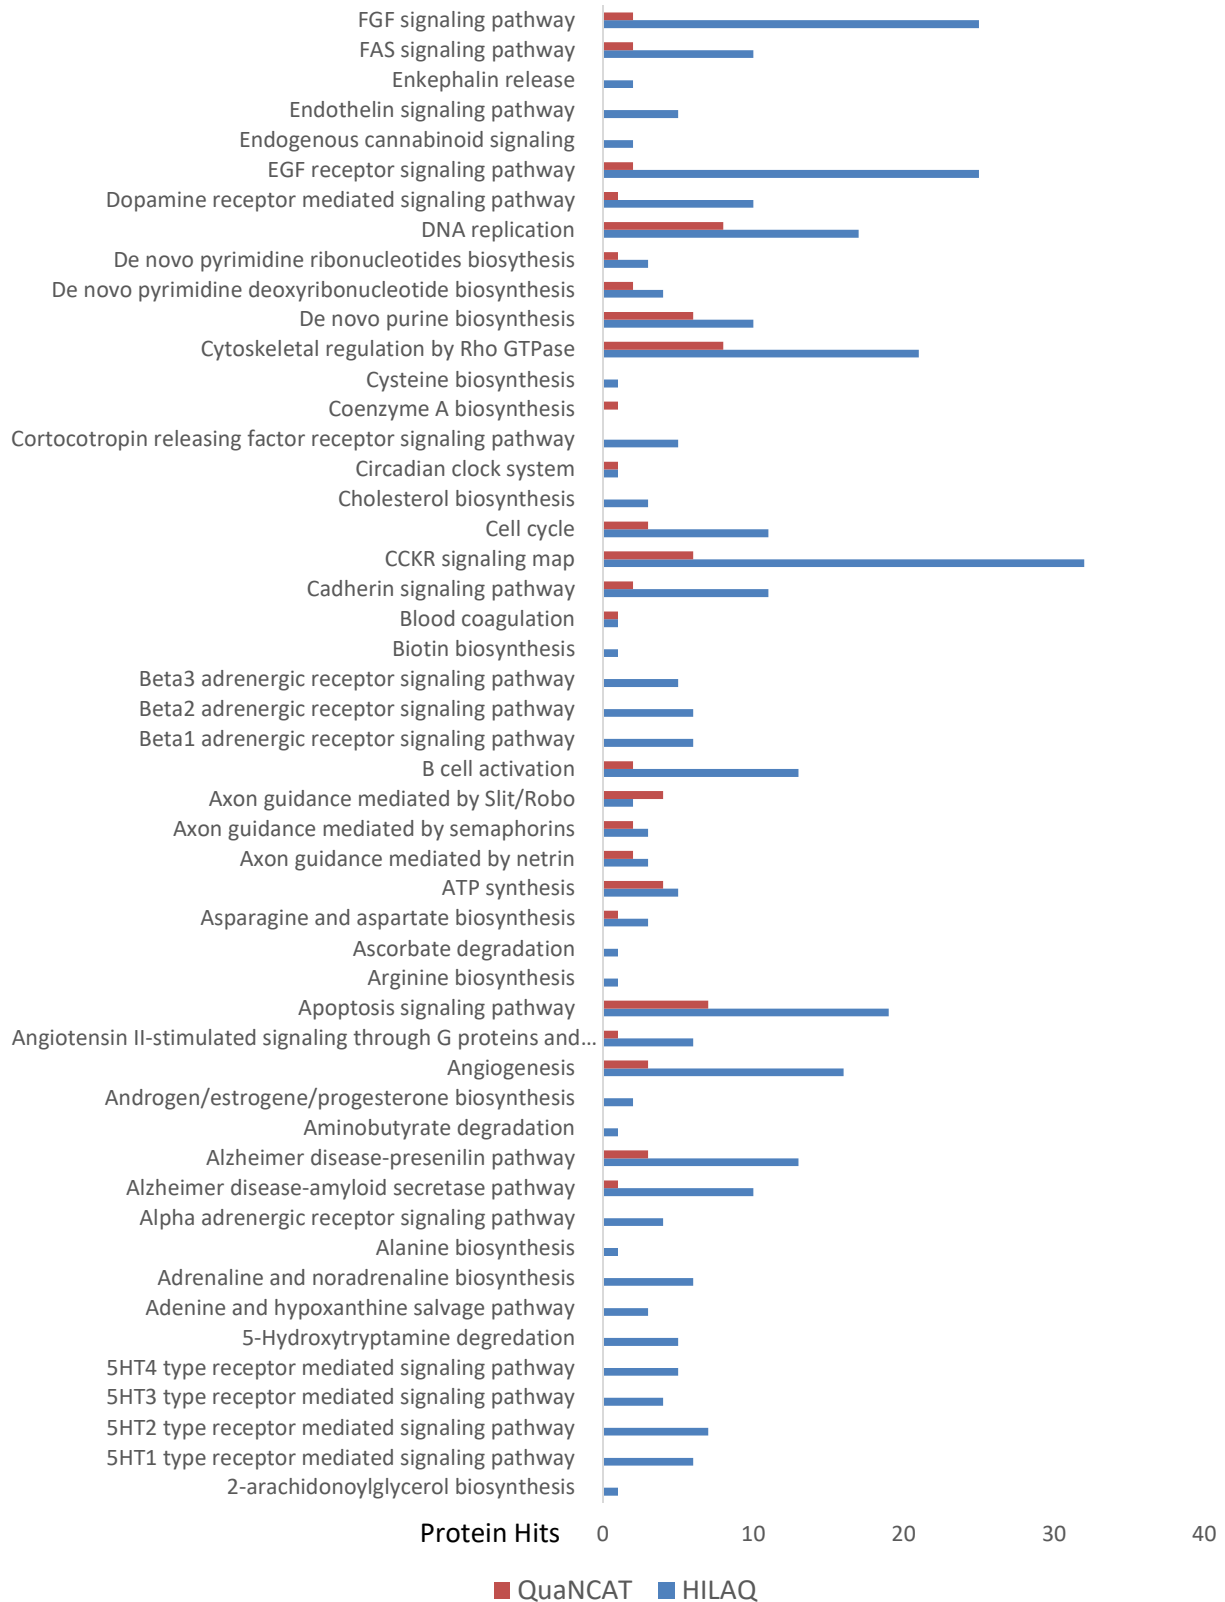

**Continued**

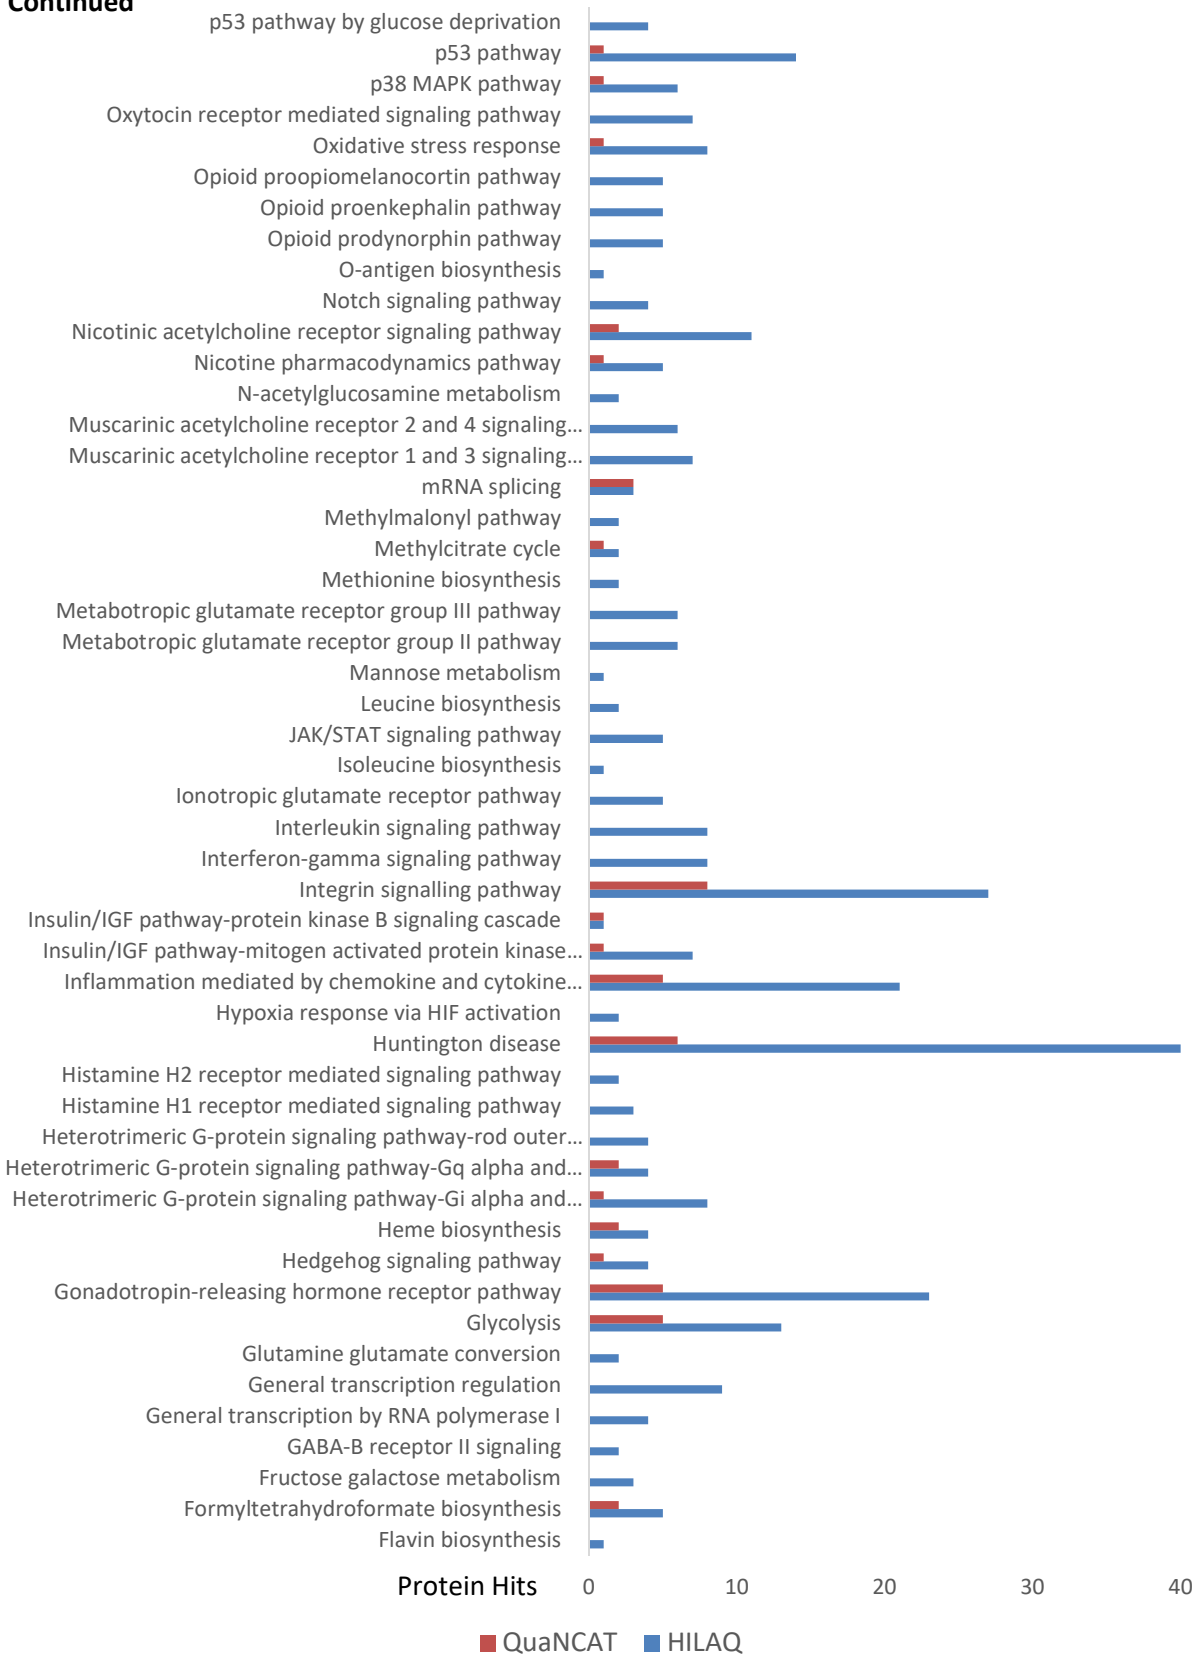

**Continued**

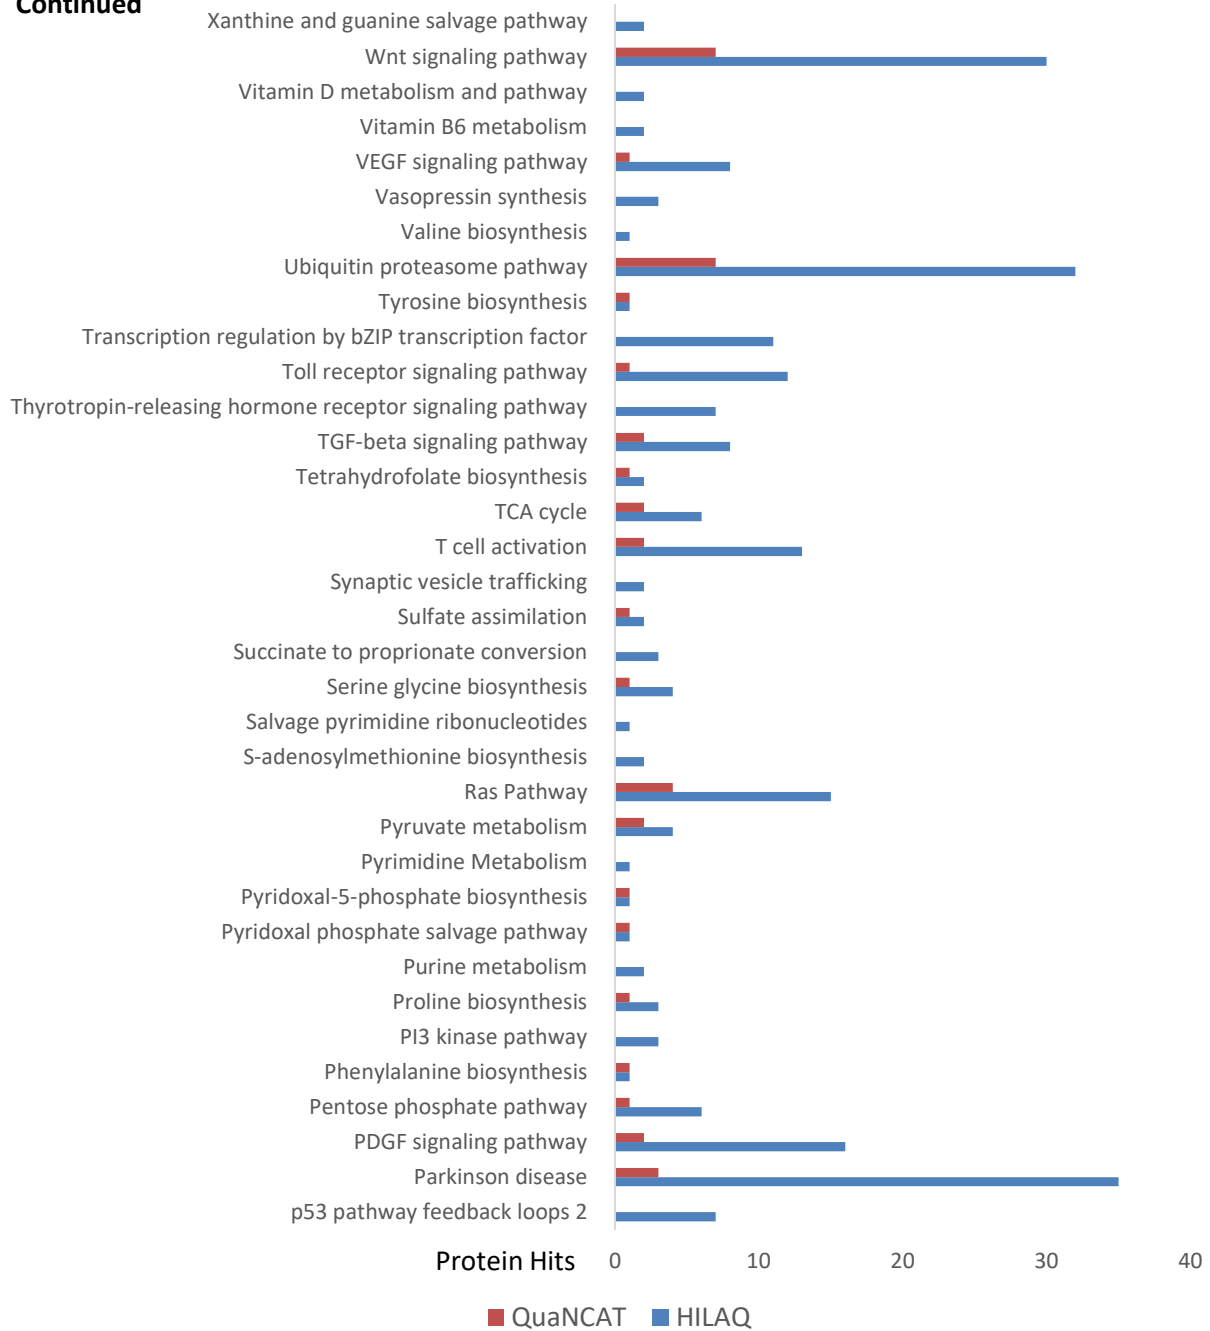

**Supplementary Figure 4**

**Pathway annotation analysis.** Proteins quantified by all three replicate of HILAQ or QuaNCAT were annotated using web based tool PANTHER (<http://pantherdb.org/>). There are two times more pathways enriched in HILAQ than QuaNCAT.



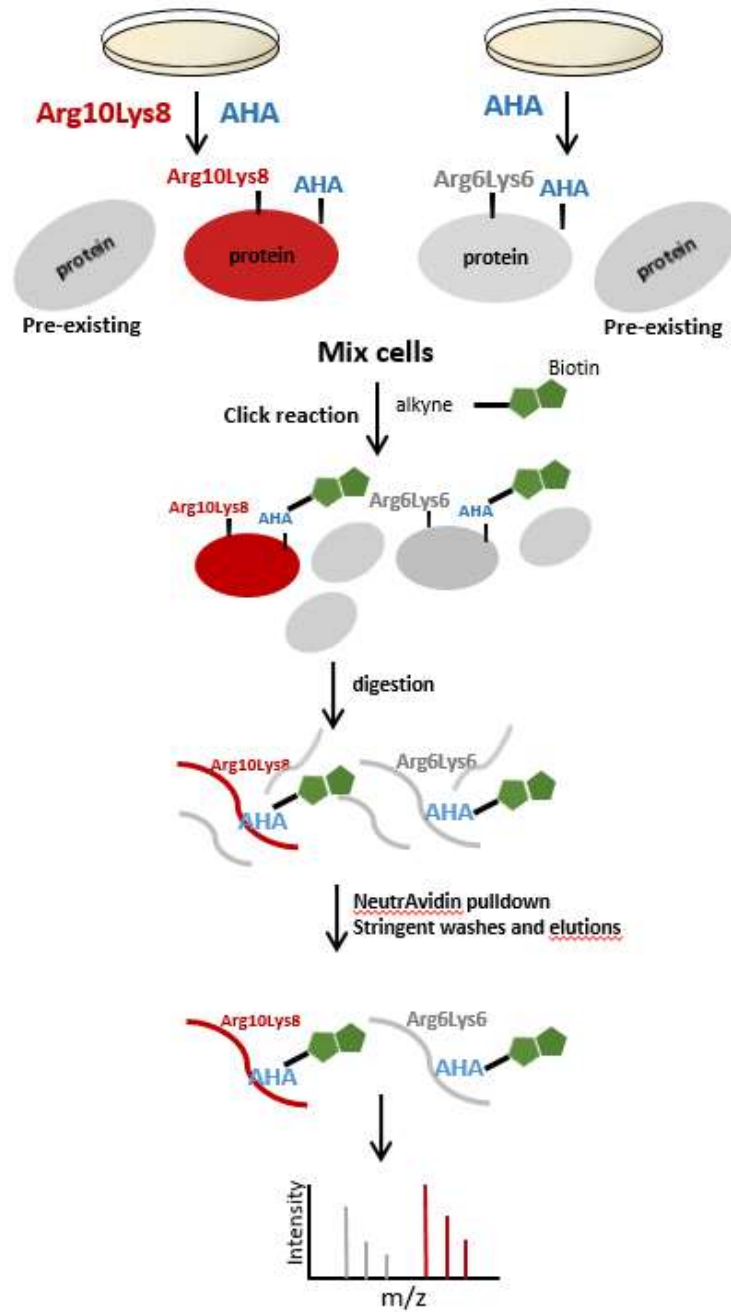

**Supplementary Figure 5**

**QuANCAT-pep workflow.** This worked flow was modified based on QuANCAT. The only difference is protein were digested firstly followed with peptide enrichment.

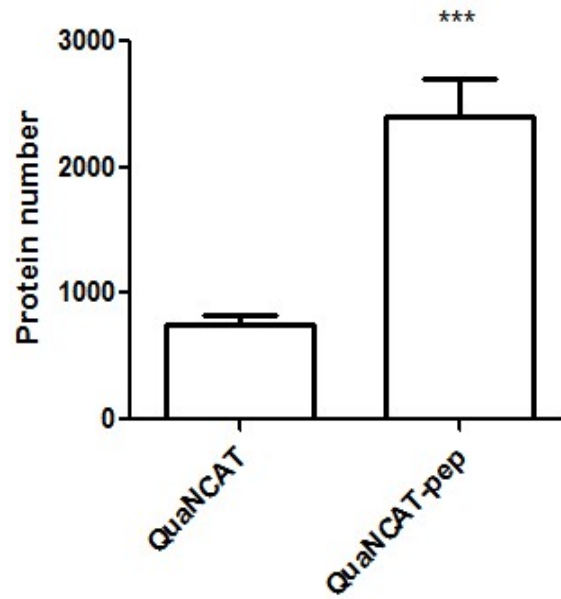

**Supplementary Figure 6**

The NSP identified were significantly increased by QuaNCAT-pep. (\*\* $p < 0.001$ ; one tailed unpaired t-test, comparison with QuaNCAT)

a

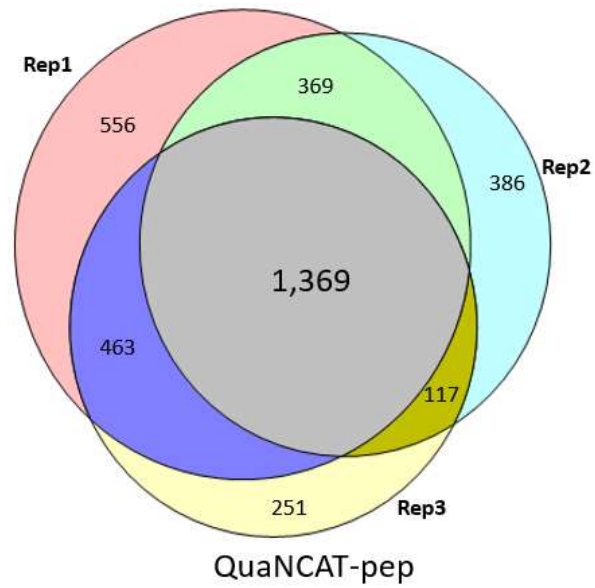

b

| Strategy    | Confident NSP | Input proteins | NSP sensitivity |
|-------------|---------------|----------------|-----------------|
| QuaNCAT-pep | 1,369         | 5,865          | 23.3%           |

### Supplementary Figure 7

(a) Venn diagram analysis on the three biological replicates of QuaNCAT-pep. (b) Only the proteins quantified in all three replicates were counted for the calculation of NSP sensitivity.

| Name                               |                                                                                   | p-value range       | # Molecules |
|------------------------------------|-----------------------------------------------------------------------------------|---------------------|-------------|
| Cellular Assembly and Organization |  | 8.98E-03 - 1.82E-09 | 43          |
| Cellular Function and Maintenance  |  | 8.98E-03 - 1.82E-09 | 39          |
| Cell Morphology                    |  | 8.98E-03 - 8.00E-09 | 48          |
| Cellular Development               |  | 8.98E-03 - 1.25E-07 | 47          |
| Cellular Growth and Proliferation  |  | 8.98E-03 - 1.25E-07 | 52          |



**Supplementary Figure 8**

Molecular and cellular functions analysis by Ingenuity IPA software package (version 28820210).
